# Supplementary material for: Risk Factors for Hepatitis E Virus Infection and Eating Habits in Kidney Transplant Recipients
Source: MDPI journal article supplement (doi:10.3390/pathogens12060850), 2023-06-20
Supplement: s1 [file s1]

Supplementary Table 1. Patient characteristics by status for cyclosporine intake

| Patient characteristics        | CyA intake<br>N=55<br>N (%) | No CyA intake<br>N=255<br>N (%) | Statistical group<br>difference<br>P-value |
|--------------------------------|-----------------------------|---------------------------------|--------------------------------------------|
| Gender                         |                             |                                 |                                            |
| Male                           | 33 (60.0)                   | 154 (60.4)                      | <b>1.000</b>                               |
| Female                         | 22 (40.0)                   | 101 (39.6)                      |                                            |
| Age                            |                             |                                 |                                            |
| Mean (y)                       | 55.1 ± 13.6                 | 53.6 ± 13.7                     | 0.515                                      |
| <40                            | 10 (18.2)                   | 47 (18.4)                       | 1.000                                      |
| 40-60                          | 27 (49.1)                   | 127 (49.8)                      | 1.000                                      |
| >60                            | 18 (32.7)                   | 81 (31.8)                       | 0.875                                      |
| Renal disease                  |                             |                                 |                                            |
| Glomerulonephritis             | 20 (36.4)                   | 66 (25.9)                       | 0.135                                      |
| Cystic kidney disease          | 7 (12.7)                    | 44 (17.3)                       | 0.548                                      |
| Diabetic nephropathy           | 7 (12.7)                    | 33 (12.9)                       | 1.000                                      |
| Hypoplastic kidneys            | 1 (1.8)                     | 16 (6.3)                        | 0.325                                      |
| Other                          | 9 (16.4)                    | 41 (16.1)                       | 1.000                                      |
| Unknown                        | 11 (20.0)                   | 49 (19.2)                       | 0.853                                      |
| Co-Morbidities                 |                             |                                 |                                            |
| Hypertension                   | 49 (89.1)                   | 199 (78.0)                      | 0.065                                      |
| Diabetes mellitus              | 13 (23.6)                   | 70 (27.5)                       | 0.618                                      |
| Arteriosclerosis               | 17 (30.9)                   | 66 (25.9)                       | 0.502                                      |
| History of cancer              | 8 (14.5)                    | 38 (14.9)                       | 1.000                                      |
| Chronic liver disease          | 16 (29.1)                   | 44 (17.3)                       | 0.059                                      |
| Time after transplantation (m) | 145 ± 97                    | 80 ± 75                         | <b>&lt;0.001</b>                           |
| Type of transplant             |                             |                                 | 0.746                                      |
| Kidney                         | 50 (90.9)                   | 227 (89.0)                      |                                            |
| Pancreas-kidney                | 4 (7.3)                     | 18 (7.1)                        |                                            |
| other multi-visceral           | 1 (1.8)                     | 10 (3.9)                        |                                            |
| Type of donation               |                             |                                 |                                            |
| Postmortem                     | 45 (81.8)                   | 184 (72.2)                      | 0.128                                      |
| Living donation                | 10 (18.2)                   | 56 (22.0)                       |                                            |
| ABOi living donation           | 0 (0.0)                     | 15 (5.9)                        |                                            |
| Re-transplant                  | 5 (9.1)                     | 32 (12.5)                       | 0.647                                      |
| Immunosuppressive regimen      |                             |                                 |                                            |
| Mycophenolic acid              | 43 (78.2)                   | 236 (91.5)                      | <b>0.005</b>                               |
| mTOR inhibitor                 | 1 (1.8)                     | 15 (5.9)                        | 0.322                                      |
| Steroid                        | 37 (67.3)                   | 206 (80.8)                      | <b>0.031</b>                               |
| Triple IS                      | 30 (54.5)                   | 191 (74.9)                      | <b>0.005</b>                               |
| Dual IS                        | 25 (45.5)                   | 64 (25.1)                       | <b>0.005</b>                               |

Data were expressed as mean (±standard deviation) or numbers (n), CyA= cyclosporine, y=years, m=months, IS= immunosuppression.

Supplementary Table 2. KTR with HEV infection subdivided by status for allograft function.

| <b>Patient characteristics</b>  | <b>Creatine <math>\leq</math> 1.4 mg/dL<br/>N= 26</b> | <b>Creatine <math>&gt;</math> 1.4 mg/dL<br/>N= 33</b> |       |
|---------------------------------|-------------------------------------------------------|-------------------------------------------------------|-------|
| Baseline creatinine (mg/dL)     | 1.1 $\pm$ 0.2                                         | 1.9 $\pm$ 0.6                                         | <0.01 |
| Baseline eGFR (mL/min)          | 69 $\pm$ 15                                           | 38 $\pm$ 13                                           | <0.01 |
| Baseline proteinuria (mg/gCrea) | 258 $\pm$ 407                                         | 448 $\pm$ 640                                         | 0.137 |
| Peak proteinuria (mg/gCrea)     | 452 $\pm$ 601                                         | 929 $\pm$ 1079                                        | 0.042 |
| Rise of proteinuria, n (%)      | 6 (23.1%)                                             | 9 (27.2%)                                             | 0.538 |
| Stable eGFR, n (%)              | 13 (50%)                                              | 13 (39.4%)                                            | 0.441 |

Data were expressed as mean ( $\pm$ standard deviation) or numbers (n), KTR= kidney transplant recipients, HEV= hepatitis E virus, eGFR= estimated glomerular filtration rate, Crea= creatinine.
